# Supplementary material for: Unexpected reversible and controllable nuclear uptake and efflux of the DNA “light-switching” Ru(ii)-polypyridyl complex in living cellsviaion-pairing with chlorophenolate counter-anions
Source: Royal Society of Chemistry journal article supplement (doi:10.1039/d0tb00821d), 2020-01-01
Supplement: d0tb00821d1.pdf [file d0tb00821d1.pdf]

## SUPPLEMENTARY MATERIAL

### **Unexpected Reversible and Controllable Nuclear Uptake and Efflux of the DNA “Light-switching” Ru(II)-Polypyridyl Complex in Living Cells via Ion-Pairing with Chlorophenolate Counter-Anions**

Rong Huang<sup>a,b</sup>, Jian-Qiang Zhu<sup>a</sup>, Miao Tang<sup>a</sup>, Chun-Hua Huang<sup>a</sup>, Zhi-Hui Zhang<sup>a,c</sup>, Zhi-Guo Sheng<sup>a</sup>, Si-Jin Liu<sup>a</sup> and Ben-Zhan Zhu<sup>a,d,\*</sup>

<sup>a</sup> State Key Laboratory of Environmental Chemistry and Ecotoxicology, Research Center for Eco-Environmental Sciences, and University of Chinese Academy of Sciences, Chinese Academy of Sciences, Beijing, 100085, China

<sup>b</sup> Key Laboratory of Biorheological Science and Technology, Ministry of Education, College of Bioengineering, Chongqing University, Chongqing, 400044, China

<sup>c</sup> Department of Stomatology, Peking University Third Hospital, Beijing, 100191, China

<sup>d</sup> Joint Institute for Environmental Science, Research Center for Eco-Environmental Sciences and Hong Kong Baptist University, Beijing/Hong Kong, China

\*To whom correspondence should be addressed. Tel: 8610-62849030; Fax: 86-10-62923563; Email: [bzhu@rcees.ac.cn](mailto:bzhu@rcees.ac.cn)

## SI FIGURES

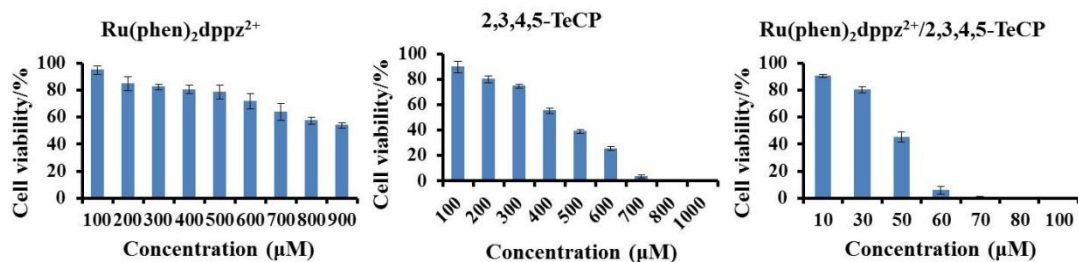

**Figure S1.** The cytotoxicity of the  $[\text{Ru}(\text{phen})_2(\text{dppz})]^{2+}$ , 2,3,4,5-TeCP and  $[\text{Ru}(\text{phen})_2(\text{dppz})]^{2+}/2,3,4,5\text{-TeCP}$  mixture on cells. Cells incubated with  $[\text{Ru}(\text{phen})_2(\text{dppz})]\text{Cl}_2$  or 2,3,4,5-TeCP or  $[\text{Ru}(\text{phen})_2(\text{dppz})]^{2+}/2,3,4,5\text{-TeCP}$  mixture (concentration ratio = 1:3) for 24 h, then measured  $\text{IC}_{50}$  by Alamar Blue Assay.

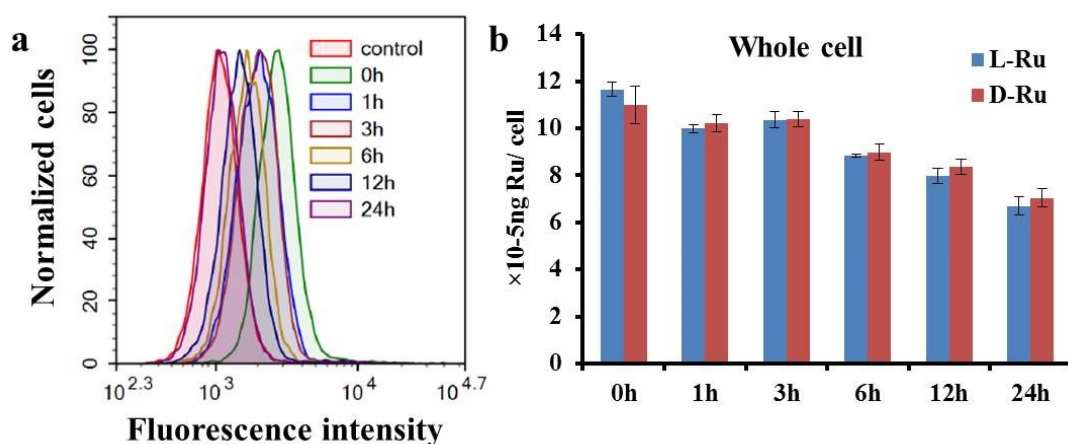

**Figure S2.** Cellular Ru decrease with time after wash with fresh medium. Cells incubated with racemic (a) or chiral (b)  $[\text{Ru}(\text{phen})_2(\text{dppz})]\text{Cl}_2$  and 2,3,4,5-TeCP for 0.5 h, washed with PBS for 3 times, incubated with fresh medium for different times, then collected cells to do FACS (a) or separated nuclear and cytoplasm to do ICP-MS (b).

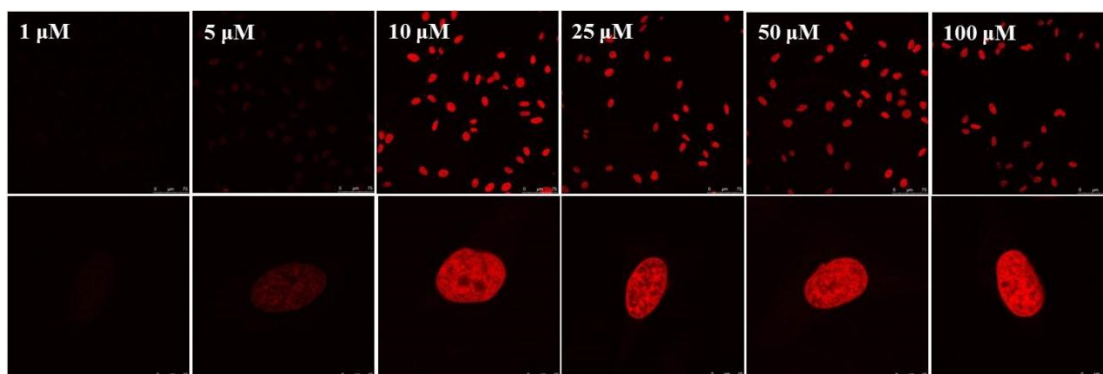

**Figure S3. Cellular uptake of  $[\text{Ru}(\text{phen})_2(\text{dppz})]^{2+}$  at different concentrations with 300  $\mu\text{M}$  2,3,4,5-TeCP.** Cells incubated with different concentrations of  $[\text{Ru}(\text{phen})_2(\text{dppz})]\text{Cl}_2$  and 300  $\mu\text{M}$  2,3,4,5-TeCP for 0.5 h. Lower images are the higher magnification of upper images.

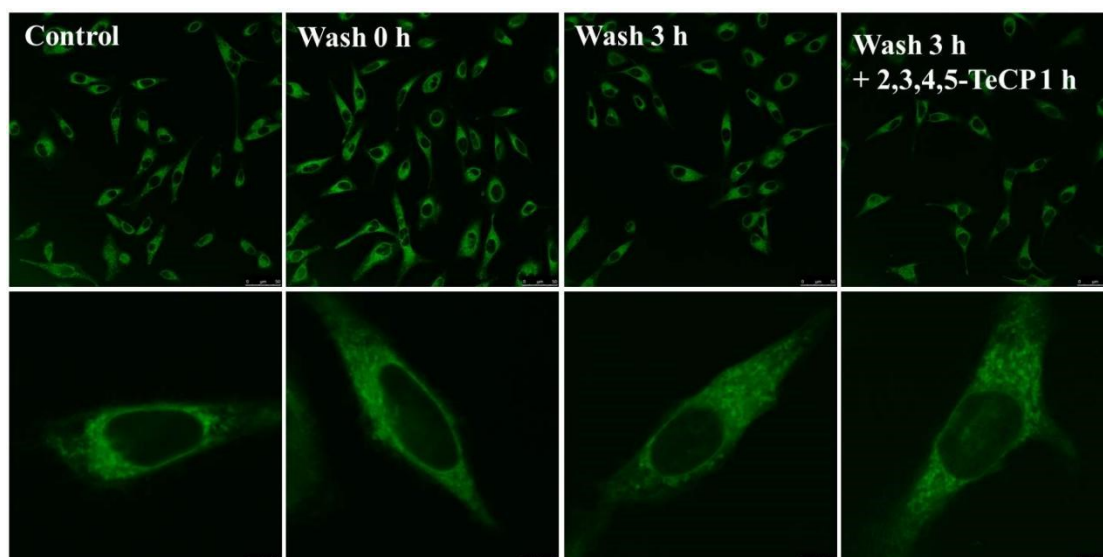

**Figure S4. The treatment with  $[\text{Ru}(\text{phen})_2(\text{dppz})]^{2+}$  and 2,3,4,5-TeCP did not damage the structure of cell membrane.** The treated cells incubated with 1  $\mu\text{M}$   $\text{DiOC}_6(3)$  for 15 min. Lower images are the higher magnification of upper images.

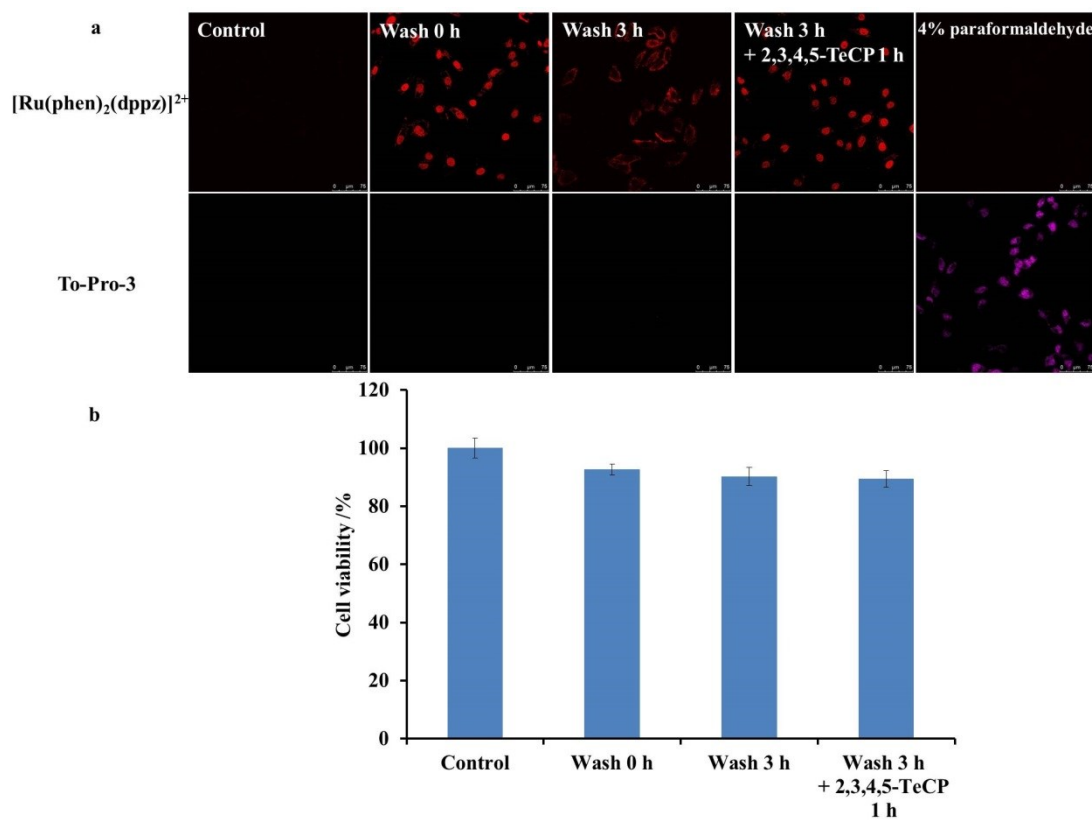

**Figure S5. The health of cells after the uptake and efflux of [Ru(phen)<sub>2</sub>(dppz)]<sup>2+</sup>, and the step of further addition of 2,3,4,5-TeCP after the washing step. a. The treatment with [Ru(phen)<sub>2</sub>(dppz)]<sup>2+</sup> and 2,3,4,5-TeCP did not damage the integrity of cell membrane. 4% paraformaldehyde was applied for positive control of To-Pro 3 staining. b. The viability of the cells after treatment has been measured by Alamar Blue Assay.**

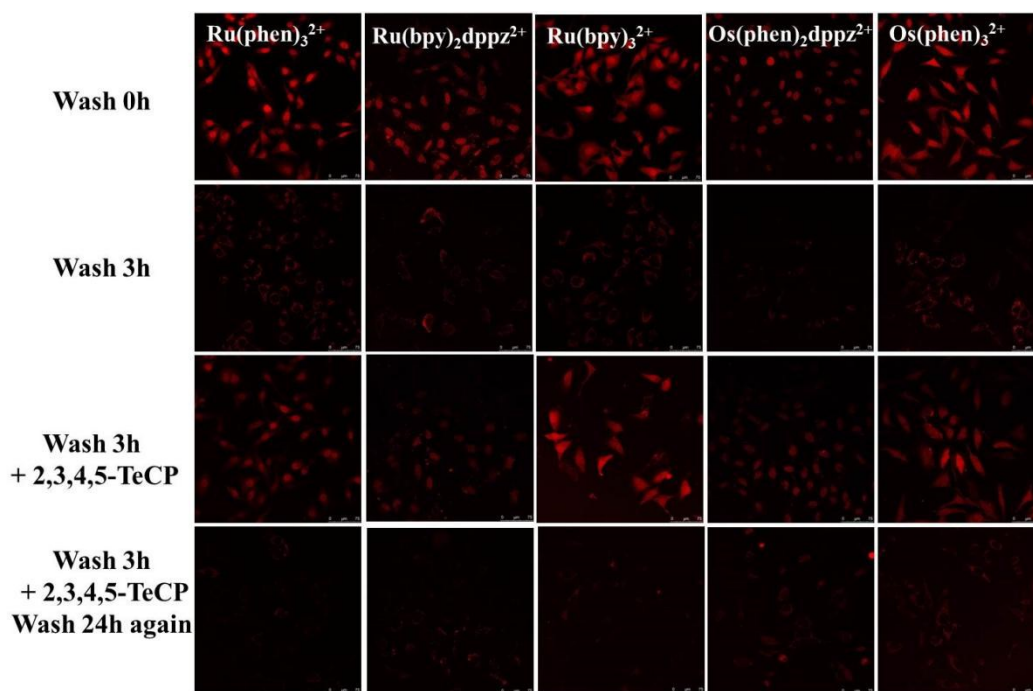

**Figure S6. Reversible nuclear uptake and efflux of Ru and Os complexes.** Cells incubated with 100  $\mu\text{M}$  Ru/Os, 300  $\mu\text{M}$  2,3,4,5-TeCP for 0.5 h, washed with PBS for 3 times, captured images after 0 h, 3 h. For cells washed after 3 h, added 300  $\mu\text{M}$  2,3,4,5-TeCP for 1 h, captured image, then washed cells with PBS for 3 times and captured images after 24 h.

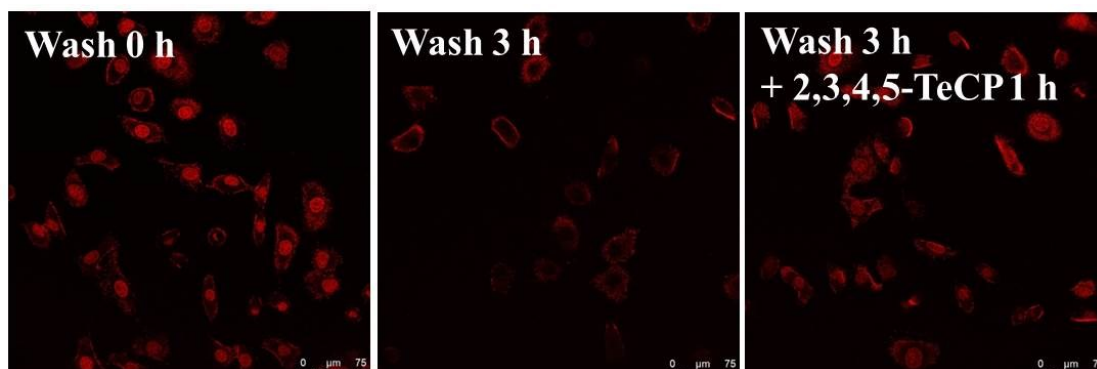

**Figure S7. Reversible nuclear uptake and efflux of Ru complex on A549 cells**
